# Supplementary material for: A Modified Mediterranean Ketogenic Diet mitigates modifiable risk factors of Alzheimer’s Disease: a serum and CSF-based metabolic analysis
Source: bioRxiv or medRxiv preprint supplement (doi:10.1101/2023.11.27.23298990), 2023-11-27
Supplement: Supplementary file [file media-3.pdf]

# Supplemental Methods

## Joint Tensor Factorization algorithm

We adopt the model setting proposed in [1], which can be used to reduce the dimensions jointly between multiple temporal tensors formed by  $\bar{T}_1$  and  $\bar{T}_2$  through the objective function:

$$\min_{\lambda, a_i, 2\xi} \sum_{i,j,t \in T_i} \left( (\bar{T}_1)_{ijt} - \lambda_1 a_i b_{ij} \xi_{it} \right)^2 + \sum_{i,j,t \in T_i} \left( (\bar{T}_2)_{ijt} - \lambda_2 a_i b_{2j} \xi_{2t} \right)^2$$

Where  $q_1 \lambda_1, \lambda_2$  are updated separately.

$$\begin{aligned} \hat{a}_i^{(t+1)} &= \operatorname{argmin}_a \left[ \sum_{j,t \in T_i} \left( b_{1j}^{(t)} \xi_{1t}^{(t)} \lambda_1^{(t)} \right)^2 + \left( b_{2j}^{(t)} \xi_{2t}^{(t)} \lambda_2^{(t)} \right)^2 \right] a_i^2 \\ &= \frac{-2 \sum_{j,t \in T_i} \left\{ (\bar{T}_1)_{ijt} \lambda_1^{(t)} b_{1j}^{(t)} \xi_{1t}^{(t)} + (\bar{T}_2)_{ijt} \lambda_2^{(t)} b_{2j}^{(t)} \xi_{2t}^{(t)} \right\} a_i}{\sum_{j,t \in T_i} \left\{ (\bar{T}_1)_{ijt} b_{1j}^{(t)} \xi_{1t}^{(t)} \lambda_1^{(t)} + (\bar{T}_2)_{ijt} b_{2j}^{(t)} \xi_{2t}^{(t)} \lambda_2^{(t)} \right\}} \\ &= \frac{\sum_{j,t \in T_i} \left\{ (\bar{T}_1)_{ijt} b_{1j}^{(t)} \xi_{1t}^{(t)} \lambda_1^{(t)} + (\bar{T}_2)_{ijt} b_{2j}^{(t)} \xi_{2t}^{(t)} \lambda_2^{(t)} \right\}}{\lambda_1^{(t)} \sum_{t \in T_i} \xi_{1t}^{(t)2} + \lambda_2^{(t)2} \sum_{t \in T_i} \xi_{2t}^{(t)2}} \\ \hat{\lambda}_1^{(t+1)} &= \operatorname{arg} \lambda_1 \min \left[ \sum_{i,j,t \in T_i} \lambda_1^2 (a_i b_{1j} \xi_{1t})^2 - 2 \sum_{i,j,t \in T_i} (\bar{T}_1)_{ijt} a_i b_{1j} \xi_{1t} \lambda_1 \right] \\ &= \frac{\sum_{i,t \in T_i} (\bar{T}_1)_{itt} a_i b_{it} \xi_{1t}}{\sum_{i,t \in T_i} (a_i \xi_{1t})^2} \\ \hat{\lambda}_2^{(t+1)} &= \frac{\sum_{i,j,t \in T_i} (\bar{T}_2)_{ijt} a_i b_{2j} \xi_{2t}}{\sum_{i,j \in T_i} (a_i \xi_{2t})^2} \\ \hat{b}_{(j)}^{(t+1)} &= \frac{\sum_{i,t \in T_i} a_i \xi_{1t} (\bar{T}_1)_{jit}}{\sum_{i,t \in \pi} (a_i \xi_{1t})^2}, \hat{b}_1^{(t+1)} = \hat{b}_1^{(t+1)} / \left\| \hat{b}^{(t+1)} \right\|_2 \\ \hat{b}_{2j}^{(t+1)} &= \frac{\sum_{i \in I_i} a_i \xi_{2t} (\bar{T}_2)_{ijt}}{\sum_{i,t \in T_i} (a_i \xi_{it})^2}, \hat{b}_2^{(t+1)} = \hat{b}_2^{(t+1)} / \left\| \hat{b}_2^{(t+1)} \right\|_2 \end{aligned}$$

where  $a$  are subject loadings,  $b$  are feature loadings that can be used to identify features contributing to the beta analysis,  $\xi^{(l)}(t)$  is the temporal loading that captures the shared temporal patterns among subjects and features, and  $\lambda$  quantifies the contribution of each component. For each  $b^1$  and  $b^2$  we define  $W^1$  and  $W^2$  respectively given by:

$$\begin{aligned} W^1 &= (\lambda_1 b^{1T})^T \\ W^2 &= (\lambda_2 b^{2T})^T \end{aligned}$$

The temporal covariance and correlations of all features across all input matrices are calculated from the final estimated matrices by:

$$\text{temporal feature covariance matrix} = \begin{bmatrix} \mathbf{W}_1 \\ \mathbf{W}_2 \end{bmatrix} \begin{bmatrix} \mathbf{W}_1 \\ \mathbf{W}_2 \end{bmatrix}^T$$

Which provides the estimated relationships between the features across both input temporal tensors across time.

## References

1. Shi, P. *et al.* *Time-Informed Dimensionality Reduction for Longitudinal Microbiome Studies* en. July 2023. <https://www.biorxiv.org/content/10.1101/2023.07.26.550749v1>.
